# Supplementary material for: Coexistence of metamagnetism and slow relaxation of magnetization in ammonium hexafluoridorhenate
Source: Royal Society of Chemistry journal article supplement (doi:10.1039/d0ra10325j), 2021-01-01
Supplement: d0ra10325j1.pdf [file d0ra10325j1.pdf]

## Coexistence of Metamagnetism and Slow Relaxation of Magnetization in Ammonium Hexafluoridorhenate

James Louis-Jean,<sup>\*a</sup> Samundeeswari M. Balasekaran,<sup>a</sup> Keith V. Lawler,<sup>‡a</sup> Adrián Sanchis-Perucho,<sup>‡b</sup> José Martínez-Lillo,<sup>\*b</sup> Dean Smith,<sup>c</sup> Paul M. Forster,<sup>a</sup> Ashkan Salamat,<sup>c</sup> and Frederic Poineau<sup>\*a</sup>

<sup>a</sup> Department of Chemistry and Biochemistry, University of Nevada Las Vegas, 4505 South Maryland Parkway, Las Vegas, Nevada, 89154-4003, United States. E-mail: [louisjea@unlv.nevada.edu](mailto:louisjea@unlv.nevada.edu) (JLJ); [poineauf@unlv.nevada.edu](mailto:poineauf@unlv.nevada.edu) (FP)

<sup>b</sup> Instituto de Ciencia Molecular (ICMol)/Departament de Química Inorgànica, Universitat de València, Catedrático José Beltrán 2, 46980 Paterna, València, Spain. E-mail: [f.jose.martinez@uv.es](mailto:f.jose.martinez@uv.es) (JML)

<sup>c</sup> Department of Physics and Astronomy, University of Nevada Las Vegas, 4505 South Maryland Parkway, Las Vegas, Nevada, 89154-4003, United States.

‡ These authors contributed equally to this work.

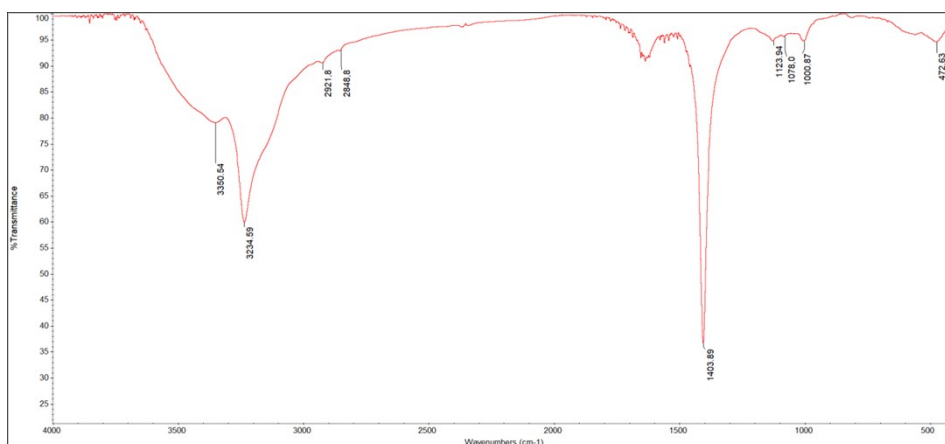

Fig. S1. Infrared spectrum (IR) for compound 1.

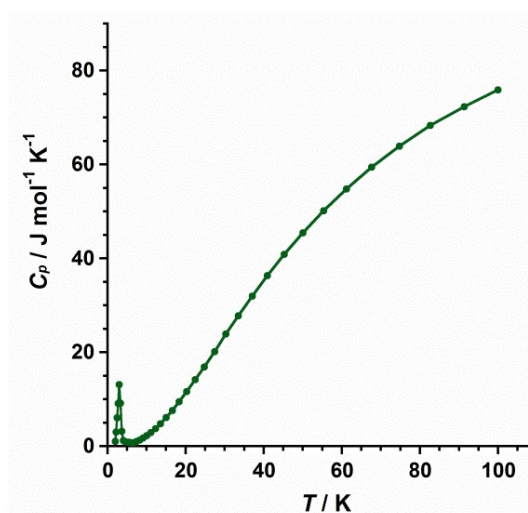

Fig. S2. Heat capacity ( $C_p$ ) versus temperature plot for compound 1.

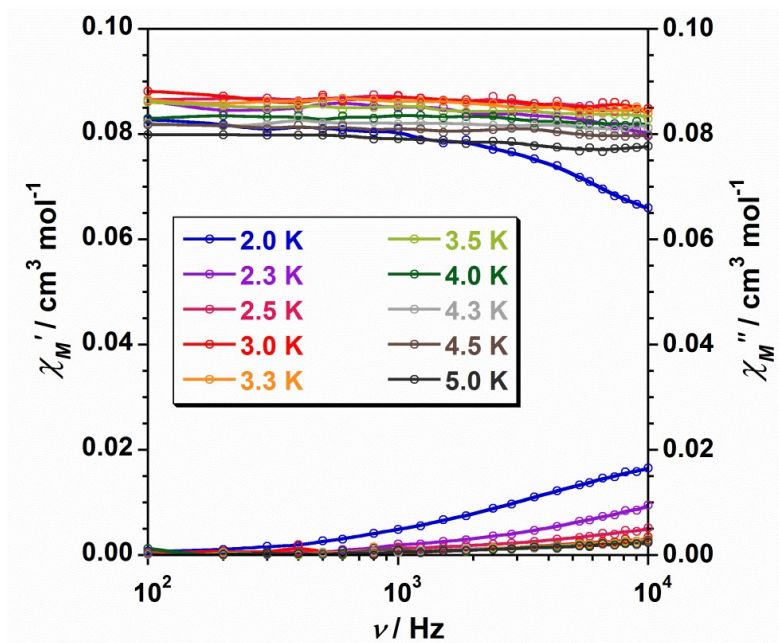

**Fig. S3.** Frequency dependence of the in-phase ( $\chi_M'$ ) and out-of-phase ( $\chi_M''$ ) ac magnetic susceptibility signals for compound **1**. Measurements performed at different temperatures and  $H_{dc} = 0$  G.

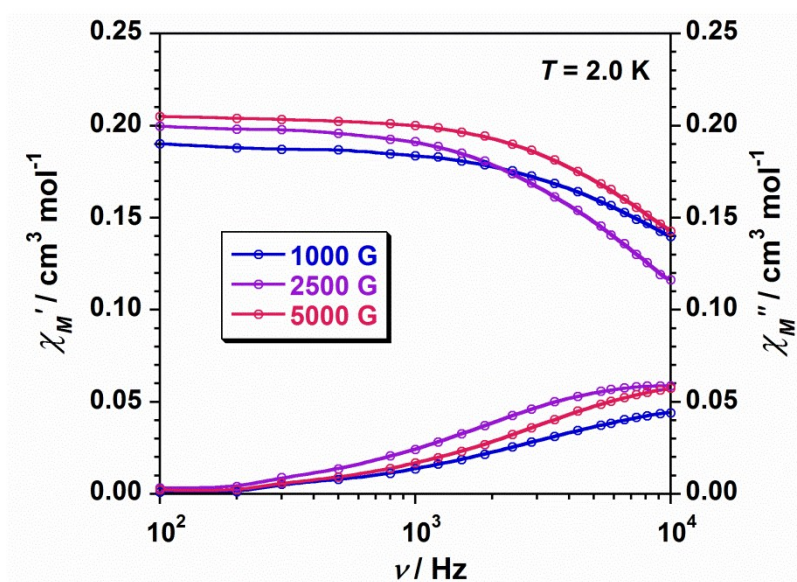

**Fig. S4.** Frequency dependence of the in-phase ( $\chi_M'$ ) and out-of-phase ( $\chi_M''$ ) ac magnetic susceptibility signals for compound **1**. Measurements performed at different dc fields and  $T = 2.0$  K.
